# Supplementary material
Source: PubMed Central journal article supplement (PMC6206507)
Supplement: NIHMS1505435-supplement-2.pdf [file NIHMS1505435-supplement-2.pdf]

## Reporting Summary

Nature Research wishes to improve the reproducibility of the work that we publish. This form provides structure for consistency and transparency in reporting. For further information on Nature Research policies, see [Authors & Referees](#) and the [Editorial Policy Checklist](#).

### Statistical parameters

When statistical analyses are reported, confirm that the following items are present in the relevant location (e.g. figure legend, table legend, main text, or Methods section).

n/a | Confirmed

- The exact sample size ( $n$ ) for each experimental group/condition, given as a discrete number and unit of measurement
- An indication of whether measurements were taken from distinct samples or whether the same sample was measured repeatedly
- The statistical test(s) used AND whether they are one- or two-sided  
*Only common tests should be described solely by name; describe more complex techniques in the Methods section.*
- A description of all covariates tested
- A description of any assumptions or corrections, such as tests of normality and adjustment for multiple comparisons
- A full description of the statistics including central tendency (e.g. means) or other basic estimates (e.g. regression coefficient) AND variation (e.g. standard deviation) or associated estimates of uncertainty (e.g. confidence intervals)
- For null hypothesis testing, the test statistic (e.g.  $F$ ,  $t$ ,  $r$ ) with confidence intervals, effect sizes, degrees of freedom and  $P$  value noted  
*Give  $P$  values as exact values whenever suitable.*
- For Bayesian analysis, information on the choice of priors and Markov chain Monte Carlo settings
- For hierarchical and complex designs, identification of the appropriate level for tests and full reporting of outcomes
- Estimates of effect sizes (e.g. Cohen's  $d$ , Pearson's  $r$ ), indicating how they were calculated
- Clearly defined error bars  
*State explicitly what error bars represent (e.g. SD, SE, CI)*

*Our web collection on [statistics for biologists](#) may be useful.*

### Software and code

Policy information about [availability of computer code](#)

Data collection

Data analysis

For manuscripts utilizing custom algorithms or software that are central to the research but not yet described in published literature, software must be made available to editors/reviewers upon request. We strongly encourage code deposition in a community repository (e.g. GitHub). See the Nature Research [guidelines for submitting code & software](#) for further information.

### Data

Policy information about [availability of data](#)

All manuscripts must include a [data availability statement](#). This statement should provide the following information, where applicable:

- Accession codes, unique identifiers, or web links for publicly available datasets
- A list of figures that have associated raw data
- A description of any restrictions on data availability

## Field-specific reporting

Please select the best fit for your research. If you are not sure, read the appropriate sections before making your selection.

Life sciences  Behavioural & social sciences  Ecological, evolutionary & environmental sciences

For a reference copy of the document with all sections, see [nature.com/authors/policies/ReportingSummary-flat.pdf](https://www.nature.com/authors/policies/ReportingSummary-flat.pdf)

## Life sciences study design

All studies must disclose on these points even when the disclosure is negative.

|                 |                                                                                                                                                     |
|-----------------|-----------------------------------------------------------------------------------------------------------------------------------------------------|
| Sample size     | We note that no power calculations were used. Sample sizes are based on previously published experiments where differences were observed.           |
| Data exclusions | No samples were excluded from the analysis.                                                                                                         |
| Replication     | Results shown are representative of several independently performed experiments. Number of biological replicates is as described in figure legends. |
| Randomization   | Treatment groups were randomly assigned to mice at weaning age.                                                                                     |
| Blinding        | Investigators were blinded to allocation during experiments and outcomes assessment, except for rare instances where blinding was not possible.     |

## Reporting for specific materials, systems and methods

### Materials & experimental systems

| n/a                                 | Included in the study                                           |
|-------------------------------------|-----------------------------------------------------------------|
| <input type="checkbox"/>            | <input checked="" type="checkbox"/> Unique biological materials |
| <input type="checkbox"/>            | <input checked="" type="checkbox"/> Antibodies                  |
| <input type="checkbox"/>            | <input checked="" type="checkbox"/> Eukaryotic cell lines       |
| <input checked="" type="checkbox"/> | <input type="checkbox"/> Palaeontology                          |
| <input type="checkbox"/>            | <input checked="" type="checkbox"/> Animals and other organisms |
| <input checked="" type="checkbox"/> | <input type="checkbox"/> Human research participants            |

### Methods

| n/a                                 | Included in the study                              |
|-------------------------------------|----------------------------------------------------|
| <input checked="" type="checkbox"/> | <input type="checkbox"/> ChIP-seq                  |
| <input type="checkbox"/>            | <input checked="" type="checkbox"/> Flow cytometry |
| <input checked="" type="checkbox"/> | <input type="checkbox"/> MRI-based neuroimaging    |

## Unique biological materials

Policy information about [availability of materials](#)

Obtaining unique materials

## Antibodies

Antibodies used

Western Blot - Total Tau - (ThermoFisher, MN1000; clone:n/a; lot:QC214397; 1:5000)  
 Western Blot - Phospho-tau S202/T205 - (ThermoFisher, MN1020; clone:n/a; lot:QJ20872020; 1:1000)  
 IHC - Phospho-tau S202/T205 - (ThermoFisher, MN1020; clone:n/a; lot:QJ20872020; 1:500)  
 IHC - Phospho-tau T231 - (ThermoFisher, MN1040; clone:AT180; lot:SL2484202; 1:500)  
 IHC - Phospho-tau S396 - (Abcam, 109390; clone: n/a; lot:GR303639-17; 1:500)  
 IHC - Gfap - (Dako, Z0334; clone:n/a; lot:20010594; 1:500)  
 IHC - Iba1 - (Novus, NB100-1028; Lot#S7C5 E210518; Clone# n/a; 1:100)  
 IF - NeuN - (EMD, MAB377; clone:n/a; lot:2987527; 1:200)  
 IF - Cd11b - (BioRad, MCA711G; clone:n/a; lot:1709; 1:500)  
 IF - Gfap - (Dako, Z0334; clone:n/a; lot:20010594; 1:500)  
 IF - DAPI - (Invitrogen, D1306; clone:n/a; lot:1836282; 1:1000)  
 IF - Goat anti-Rat AlexaFluor 594 - (Invitrogen, A-11007; clone:n/a; lot:1903506; 1:500)  
 IF - Iba1 - (Wako, 019-19741; clone:n/a; lot:LKH4161; 1:500)  
 FACS IF - LIVE/DEAD Aqua - (Invitrogen, L34966; clone:n/a; lot:1899019; 1:250)  
 FACS IF - Cd11b eFluor 450 - (eBioscience, 48-0112-80; clone:M1/70; lot:4306306; 1:100)  
 FACS IF - Cd45 APC eFluor 780 - (eBioscience, 47-0451-82; clone:30-F11; lot:E10101-1636; 1:200)

## Validation

FACS IF - Glast1 PE - (Miltenyi Biotec, 130-095-821; clone:n/a; lot:5160331127; 1:100)  
 FACS IF - O1 AF 700 - (R&D Systems, FAB1327N-100UG; clone:n/a; lot:1474296; 1:100)  
 FACS IF - Cd56 APC (R&D Systems, FAB7820A; clone:n/a; lot:ADIK0117051; 1:100)

All antibodies are from commercially available sources and have been validated from the manufacturer with supporting publications found on manufacturer websites. See below for summary:

Western Blot - Total Tau - (ThermoFisher; MN1000)

Species: Bovine, Rat, Non-human primate, Human, Mouse

Application: ELISA, Immunocytochemistry, Immunofluorescence, Immunohistochemistry, Western Blot

Western Blot - Phospho-tau S202/T205 - (ThermoFisher, MN1020)

Species: Chicken, Dog, Fruit fly, Hamster, Human, Mouse, Non-human primate, Rabbit, Rat

Application: ELISA, Immunocytochemistry, Immunofluorescence, Immunohistochemistry, Western Blot

IHC - Phospho-tau S202/T205 - (ThermoFisher, MN1020)

Species: Chicken, Dog, Fruit fly, Hamster, Human, Mouse, Non-human primate, Rabbit, Rat

Application: ELISA, Immunocytochemistry, Immunofluorescence, Immunohistochemistry, Western Blot

IHC - Phospho-tau T231 - (ThermoFisher, MN1040)

Species: Cat, Chicken, Dog, Fruit fly, Hamster, Horse, Human, Mouse, Non-human primate, Rabbit, Rat

Application: Immunofluorescence, Immunohistochemistry, Western Blot

IHC - Phospho-tau S396 - (Abcam, 109390)

Species: Mouse, Rat, Human

Application: Dot blot, Immunohistochemistry, Western Blot

IHC - Gfap - (Dako, Z0334)

Species: Cat, Cow, Dog, Mouse, Rat, Sheep

Application: Immunohistochemistry, Immunofluorescence

IHC - Iba1 - (Novus, NB100-1028)

Species: Human, Mouse, Rat, Porcine

Application: Western Blot, Immunohistochemistry, Immunofluorescence, ELISA

IF - NeuN - (EMD, MAB377)

Species: Human, Rat, Mouse, Ferret, Chick and Salamander

Application: Immunohistochemistry, Immunofluorescence, Immunoblotting

IF - Cd11b - (BioRad, MCA711G)

Species: Mouse, Human

Application: Flow Cytometry, Immunohistology, Immunoprecipitation Immunofluorescence

IF - Gfap - (Dako, Z0334)

Species: Cat, Cow, Dog, Mouse, Rat, Sheep

Application: Immunohistochemistry, Immunofluorescence

IF - DAPI - (Invitrogen, D1306)

Species: Nucleic Acid

Application: Immunofluorescence

IF - Goat-anti-Rat AlexaFluor 594 (Invitrogen, A-11007)

Species: N/A

Application: Flow Cytometry, Immunohistochemistry, Immunofluorescence

IF - Iba1 - (Wako, 019-19741)

Species: Rat, Mouse

Application: Immunohistochemistry, Immunofluorescence, Western Blot

FACS IF - LIVE/DEAD Aqua - (Invitrogen, L34966)

Species: Eukaryotic Cells

Application: Flow Cytometry

FACS IF - Cd11b eFluor 450 - (eBioscience, 48-0112-80)

Species: Mouse, Human

Application: Flow Cytometry

FACS IF - Cd45 APC eFluor 780 - (eBioscience, 47-0451-82)

Species: Mouse, Human

Application: Flow Cytometry

FACS IF - Glast1 PE - (Miltenyi Biotec, 130-095-821)

Species: Human, Mouse, Rat

Application: Flow Cytometry, Immunofluorescence

FACS IF - O1 AF 700 - (R&D Systems, FAB1327N)

Species: Human, Mouse, Rat, Chicken

Application: Flow Cytometry

FACS IF - Cd56 APC (R&D Systems, FAB7820A)

Species: Mouse

Application: Flow Cytometry

## Eukaryotic cell lines

Policy information about [cell lines](#)

|                                                                      |                                                                                                                        |
|----------------------------------------------------------------------|------------------------------------------------------------------------------------------------------------------------|
| Cell line source(s)                                                  | Primary astrocyte and microglia cultures generated within the laboratory from genetically modified mice.               |
| Authentication                                                       | Antibody staining (and RT-qPCR) for cell identity was performed prior to experimentation.                              |
| Mycoplasma contamination                                             | All cultures were primary cultures that were used at early passage. They were not tested for mycoplasma contamination. |
| Commonly misidentified lines<br>(See <a href="#">ICLAC</a> register) | None of the cell lines used are listed in the ICLAC database                                                           |

## Animals and other organisms

Policy information about [studies involving animals](#); [ARRIVE guidelines](#) recommended for reporting animal research

|                         |                                                                                                                                                                                                                                                                                                                                                                                                                                                                                                                                    |
|-------------------------|------------------------------------------------------------------------------------------------------------------------------------------------------------------------------------------------------------------------------------------------------------------------------------------------------------------------------------------------------------------------------------------------------------------------------------------------------------------------------------------------------------------------------------|
| Laboratory animals      | P301S (MAPT) PS19 mice were purchased from The Jackson Laboratory (stock #008169) and bred to C57BL/6 for three generations. C57BL/6 ATTAC transgenic mice are as described {Baker et al., Nature 2016; Baker et al., Nature 2011}. Male PS19 mice were bred to ATTAC females to generate cohorts of ATTAC and PS19;ATTAC mice. All mice were on a pure C57BL/6 genetic background. Age range included postnatal day 1-3 for mixed glial cultures; 3, 4, 6, 8, 10, and 12 months $\pm$ 2 weeks of age for all in vivo experiments. |
| Wild animals            | No wild animals were used in this study.                                                                                                                                                                                                                                                                                                                                                                                                                                                                                           |
| Field-collected samples | No field-collected samples were used in this study.                                                                                                                                                                                                                                                                                                                                                                                                                                                                                |

## Flow Cytometry

### Plots

Confirm that:

- The axis labels state the marker and fluorochrome used (e.g. CD4-FITC).
- The axis scales are clearly visible. Include numbers along axes only for bottom left plot of group (a 'group' is an analysis of identical markers).
- All plots are contour plots with outliers or pseudocolor plots.
- A numerical value for number of cells or percentage (with statistics) is provided.

### Methodology

|                           |                                                                                                                                                                                                                                           |
|---------------------------|-------------------------------------------------------------------------------------------------------------------------------------------------------------------------------------------------------------------------------------------|
| Sample preparation        | All information is as described in the methods section.                                                                                                                                                                                   |
| Instrument                | FACSAria IIu SORP (BD Bioscience)                                                                                                                                                                                                         |
| Software                  | FACSDiva 8.0.1                                                                                                                                                                                                                            |
| Cell population abundance | The relative populations of cells were as follows (on average) from the 'live cells': Astrocytes (~27%), microglia (~14%), oligodendrocytes (~7%) and Cd56+ (~15%). Cell populations were verified with RT-qPCR for cell lineage markers. |
| Gating strategy           | This information can be found in Extended Data Fig. 4. Additional information can be provided if necessary.                                                                                                                               |

Tick this box to confirm that a figure exemplifying the gating strategy is provided in the Supplementary Information.
