# Supplementary material
Source: PubMed Central journal article supplement (PMC6206507)

# Supplementary Figure 1 – Bussian et al.

Uncropped scans with size marker indications

Figure 2a

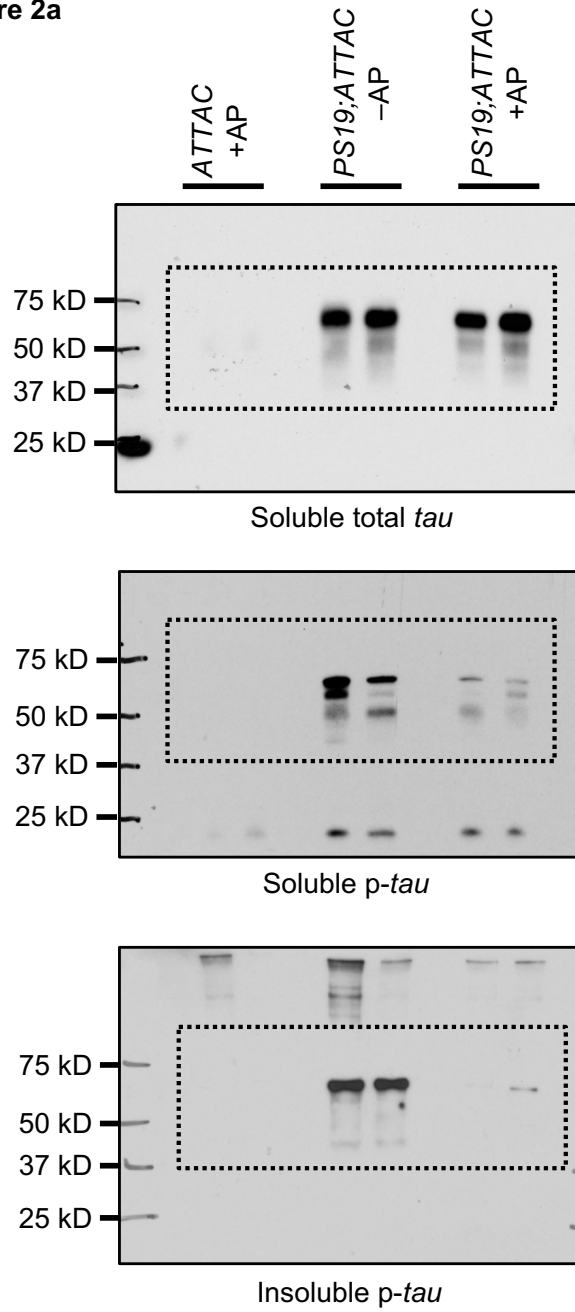

Supplement: NIHMS1505435-supplement-1.pdf [file NIHMS1505435-supplement-1.pdf]
